# Supplementary material
Source: publisher site journal article supplement (https://static.cambridge.org/content/id/urn:cambridge.org:id:article:S0924270819000346/resource/name/S0924270819000346supp001.doc)
Supplement: Supplementary file 1 [file S0924270819000346supp001.doc]

**Supplementary material S1. The full FADK questionnaire in the English and**

**the Danish language.**

**QUESTIONNAIRE ON EATING HABITS, ADULTS (Yale Food Addiction Scale 2.0)**

This survey asks about your eating habits in the past year. People sometimes have difficulty controlling how much they eat of certain foods such as:

- Sweets like ice cream, chocolate, doughnuts, cookies, cake, candy

- Starches like white bread, rolls, pasta, and rice

- Salty snacks like chips, pretzels, and crackers

- Fatty foods like steak, bacon, hamburgers, cheeseburgers, pizza, and French fries

- Sugary drinks like soda pop, lemonade, sports drinks, and energy drinks

When the following questions ask about “CERTAIN FOODS” please think of ANY foods or beverages similar to those listed in the food or beverage groups above or ANY OTHER foods you have had difficulty with in the past year

| **IN THE PAST 12 MONTHS:** | **Never** | **Less than monthly** | **Once a month** | **2-3 times a month** | **Once a week** | **2-3 times a week** | **4-6 times a week** | **Every Day** |
| --- | --- | --- | --- | --- | --- | --- | --- | --- |
| 1. When I started to eat certain foods, I ate much more than   planned. | 0 | 1 | 2 | 3 | 4 | 5 | 6 | 7 |
| 1. I continued to eat certain foods even though I was no longer   hungry. | 0 | 1 | 2 | 3 | 4 | 5 | 6 | 7 |
| 1. I ate to the point where I felt physically ill | 0 | 1 | 2 | 3 | 4 | 5 | 6 | 7 |
| 1. I worried a lot about cutting down on certain types of food,   but I ate them anyways. | 0 | 1 | 2 | 3 | 4 | 5 | 6 | 7 |
| 1. I spent a lot of time feeling sluggish or tired from   overeating. | 0 | 1 | 2 | 3 | 4 | 5 | 6 | 7 |
| 1. I spent a lot of time eating certain foods throughout the day. | 0 | 1 | 2 | 3 | 4 | 5 | 6 | 7 |
| 1. When certain foods were not available, I went out of my way to get them. For example, I went to the store to get certain foods even though I had other things to eat at home. | 0 | 1 | 2 | 3 | 4 | 5 | 6 | 7 |
| 1. I ate certain foods so often or in such large amounts that I stopped doing other important things. These things may have been working or spending time with family or friends. | 0 | 1 | 2 | 3 | 4 | 5 | 6 | 7 |
| 1. I had problems with my family or friends because of how   much I overate. | 0 | 1 | 2 | 3 | 4 | 5 | 6 | 7 |
| 1. I avoided work, school or social activities because I was afraid I would overeat there. | 0 | 1 | 2 | 3 | 4 | 5 | 6 | 7 |
| 1. When I cut down on or stopped eating certain foods, I felt irritable, nervous or sad. | 0 | 1 | 2 | 3 | 4 | 5 | 6 | 7 |
| 1. If I had physical symptoms because I hadn’t eaten certain foods, I would eat those foods to feel better. | 0 | 1 | 2 | 3 | 4 | 5 | 6 | 7 |
| 1. If I had emotional problems because I hadn’t eaten certain foods, I would eat those foods to feel better. | 0 | 1 | 2 | 3 | 4 | 5 | 6 | 7 |
| 1. When I cut down on or stopped eating certain foods, I had physical symptoms. For example, I had headaches or fatigue. | 0 | 1 | 2 | 3 | 4 | 5 | 6 | 7 |
| 1. When I cut down or stopped eating certain foods, I had strong cravings for them. | 0 | 1 | 2 | 3 | 4 | 5 | 6 | 7 |
| 1. My eating behavior caused me a lot of distress. | 0 | 1 | 2 | 3 | 4 | 5 | 6 | 7 |
| 1. I had significant problems in my life because of food and eating. These may have been problems with my daily routine, work, school, friends, family, or health. | 0 | 1 | 2 | 3 | 4 | 5 | 6 | 7 |
| 1. I felt so bad about overeating that I didn’t do other important things. These things may have been working or spending time with family or friends. | 0 | 1 | 2 | 3 | 4 | 5 | 6 | 7 |
| 1. My overeating got in the way of me taking care of my   family or doing household chores. | 0 | 1 | 2 | 3 | 4 | 5 | 6 | 7 |
| 1. I avoided work, school or social functions because I could not eat certain foods there. | 0 | 1 | 2 | 3 | 4 | 5 | 6 | 7 |
| 1. I avoided social situations because people wouldn’t approve   of how much I ate. | 0 | 1 | 2 | 3 | 4 | 5 | 6 | 7 |
| 1. I kept eating in the same way even though my eating caused   emotional problems. | 0 | 1 | 2 | 3 | 4 | 5 | 6 | 7 |
| 1. I kept eating the same way even though my eating caused   physical problems. | 0 | 1 | 2 | 3 | 4 | 5 | 6 | 7 |
| 1. Eating the same amount of food did not give me as much   enjoyment as it used to. | 0 | 1 | 2 | 3 | 4 | 5 | 6 | 7 |
| 1. I really wanted to cut down on or stop eating certain kinds   of foods, but I just couldn’t. | 0 | 1 | 2 | 3 | 4 | 5 | 6 | 7 |
| 1. I needed to eat more and more to get the feelings I wanted   from eating. This included reducing negative emotions like  sadness or increasing pleasure. | 0 | 1 | 2 | 3 | 4 | 5 | 6 | 7 |
| 1. I didn’t do well at work or school because I was eating too   much. | 0 | 1 | 2 | 3 | 4 | 5 | 6 | 7 |
| 1. I kept eating certain foods even though I knew it was   physically dangerous. For example, I kept eating sweets  even though I had diabetes. Or I kept eating fatty foods  despite having heart disease. | 0 | 1 | 2 | 3 | 4 | 5 | 6 | 7 |
| 1. I had such strong urges to eat certain foods that I couldn’t   think of anything else. | 0 | 1 | 2 | 3 | 4 | 5 | 6 | 7 |
| 1. I had such intense cravings for certain foods that I felt like I   had to eat them right away. | 0 | 1 | 2 | 3 | 4 | 5 | 6 | 7 |
| 1. I tried to cut down on or not eat certain kinds of food, but I wasn’t successful. | 0 | 1 | 2 | 3 | 4 | 5 | 6 | 7 |
| 1. I tried and failed to cut down on or stop eating certain foods. | 0 | 1 | 2 | 3 | 4 | 5 | 6 | 7 |
| 1. I was so distracted by eating that I could have been hurt   (e.g., when driving a car, crossing the street, operating  machinery). | 0 | 1 | 2 | 3 | 4 | 5 | 6 | 7 |
| 1. I was so distracted by thinking about food that I could have   been hurt (e.g., when driving a car, crossing the street,  operating machinery). | 0 | 1 | 2 | 3 | 4 | 5 | 6 | 7 |
| 1. My friends or family were worried about how much I overate. | 0 | 1 | 2 | 3 | 4 | 5 | 6 | 7 |

**QUESTIONNAIRE ON WELL-BEING (WHO-5)**

Please indicate for each of the five statements which is closest to how you have been feeling over the last two weeks.

Notice that higher numbers mean better well-being.

Example: If you have felt cheerful and in good spirits more than half of the time during the last two weeks, put a tick in

the box with the number 3 in the upper right corner.

| **Over the last two weeks…** | **All of**  **the time** | **Most of the**  **time** | **More than**  **half of the**  **time** | **Less than**  **half of the**  **time** | **Some of**  **the time** | **At no time** |
| --- | --- | --- | --- | --- | --- | --- |
| 1. I have felt cheerful and in good spirits | 5 | 4 | 3 | 2 | 1 | 0 |
| 1. I have felt calm and relaxed | 5 | 4 | 3 | 2 | 1 | 0 |
| 1. I have felt active and vigorous | 5 | 4 | 3 | 2 | 1 | 0 |
| 1. I woke up feeling fresh and rested | 5 | 4 | 3 | 2 | 1 | 0 |
| 1. My daily life has been filled with things that interest me | 5 | 4 | 3 | 2 | 1 | 0 |

**QUESTIONNAIRE ON EATING (EDE-Q)**

Instructions: The following questions are concerned with the past four weeks (28 days) only. Please read each question carefully. Please answer all the questions. Thank you.

Questions 1 to 12: Please circle the appropriate number on the right. Remember that the questions only refer to the past four weeks (28 days) only.

| ON HOW MANY OF THE PAST 28 DAYS ... | 0 days | 1-5 days | 6-12 days | 13-15 days | 16-22 days | 23-27 days | Every day |
| --- | --- | --- | --- | --- | --- | --- | --- |
| 1. Have you been deliberately trying to limit the amount of food you eat to influence your shape or weight (whether or not you have succeeded)? | 0 | 1 | 2 | 3 | 4 | 5 | 6 |
| 2. Have you gone for long periods of time (8 waking hours or more) without eating anything at all in order to influence your shape or weight? | 0 | 1 | 2 | 3 | 4 | 5 | 6 |
| 3. Have you tried to exclude from your diet any foods that you like in order to influence your shape or weight (whether or not you have succeeded)? | 0 | 1 | 2 | 3 | 4 | 5 | 6 |
| 4. Have you tried to follow definite rules regarding your eating (for example, a calorie limit) in order to influence your shape or weight (whether or not you have succeeded)? | 0 | 1 | 2 | 3 | 4 | 5 | 6 |
| 5. Have you had a definite desire to have an empty stomach with the aim of influencing your shape or weight? | 0 | 1 | 2 | 3 | 4 | 5 | 6 |
| 6. Have you had a definite desire to have a totally flat stomach? | 0 | 1 | 2 | 3 | 4 | 5 | 6 |
| 7. Has thinking about food, eating or calories made it very difficult to concentrate on things you are interested in (for example, working, following a conversation, or reading)? | 0 | 1 | 2 | 3 | 4 | 5 | 6 |
| 8. Has thinking about shape or weight made it very difficult to concentrate on things you are interested in (for example, working, following a conversation, or reading)? | 0 | 1 | 2 | 3 | 4 | 5 | 6 |
| 9. Have you had a definite fear of losing control over eating? | 0 | 1 | 2 | 3 | 4 | 5 | 6 |
| 10. Have you had a definite fear that you might gain weight? | 0 | 1 | 2 | 3 | 4 | 5 | 6 |
| 11. Have you felt fat? | 0 | 1 | 2 | 3 | 4 | 5 | 6 |
| 12. Have you had a strong desire to lose weight? | 0 | 1 | 2 | 3 | 4 | 5 | 6 |
|  |  |  |  |  |  |  |  |

**Questions 13-18: Please fill in the appropriate number in the boxes on the right. Remember that the questions only refer to the past four weeks (28 days).**

| **Over the past four weeks (28 days)….** | 0 day/  times | 1-5 days/  times | 6-12 days/  times | 13-15 days/  times | 16-22 days/  times | 23-27 days/  times | Every day |
| --- | --- | --- | --- | --- | --- | --- | --- |
| 13. Over the past 28 days, how many TIMES have you eaten what other people would regards as an unusually large amount of food (given the circumstances)? | 0 | 1 | 2 | 3 | 4 | 5 | 6 |
| 14. … On how many of these TIMES did you have a sense of having lost control over your eating (at the time you were eating)? | 0 | 1 | 2 | 3 | 4 | 5 | 6 |
| 15. Over the past 28 days, on how many DAYS have such episodes of overeating occurred (i.e. you have eaten an unusually large amount of food and have had a sense of loss of control at the time)? | 0 | 1 | 2 | 3 | 4 | 5 | 6 |
| 16. Over the past 28 days, how many TIMES have you made yourself sick (vomit) as a means of controlling your shape or weight? | 0 | 1 | 2 | 3 | 4 | 5 | 6 |
| 17. Over the past 28 days, how many TIMES have you taken laxatives as a means of controlling your shape or weight? | 0 | 1 | 2 | 3 | 4 | 5 | 6 |
| 18. Over the past 28 days, how many TIMES have you exercised in a “driven” or “compulsive” way as a means of controlling your weight, shape or amount of fat, or to burn off calories? | 0 | 1 | 2 | 3 | 4 | 5 | 6 |

**Questions 19 to 21: Please circle the appropriate number. Please note that for these questions the term “binge eating” means eating what others would regard as an unusually large amount of food for the circumstances, accompanied by a sense of having lost control over eating.**

| **Over the past four weeks (28 days)….** | 0  days | 1-5 days | 6-12  days | 13-15 days | 16-22 days | 23-27 days | Every  day |
| --- | --- | --- | --- | --- | --- | --- | --- |
| 19. Over the past 28 days, on how many days have you eaten in secret (ie, furtively)? … Do not count episodes of binge eating. | 0 | 1 | 2 | 3 | 4 | 5 | 6 |
|  | None of the times | A few of the times | Less than half | Half of the times | More than half | Most of the time | Every time |
| 20. On what proportion of the times that you have eaten have you felt guilty (felt that you’ve done wrong) because of its effect on your shape or weight? … Do not count episodes of binge eating. | 0 | 1 | 2 | 3 | 4 | 5 | 6 |
|  | Not at all | Slightly | | Moderately | | Markedly | |
| 21. Over the past 28 days, how concerned have you been about other people seeing you eat? … Do not count episodes of binge eating. | 0 | 1 | 2 | 3 | 4 | 5 | 6 |

**Questions 22 to 28: Please circle the appropriate number on the right. Remember that the questions only refer to the past four weeks (28 days).**

| **Over the past four weeks (28 days)….** | Not at all | Slightly | | Moderately | | Markedly | |
| --- | --- | --- | --- | --- | --- | --- | --- |
| 22. Has your weight influenced how you think about (judge) yourself as a person? | 0 | 1 | 2 | 3 | 4 | 5 | 6 |
| 23. Has your shape influenced how you think about (judge) yourself as a person? | 0 | 1 | 2 | 3 | 4 | 5 | 6 |
| 24. How much would it have upset you if you had been asked to weigh yourself once a week (no more, or less, often) for the next four weeks? | 0 | 1 | 2 | 3 | 4 | 5 | 6 |
| 25. How dissatisfied have you been with your weight? | 0 | 1 | 2 | 3 | 4 | 5 | 6 |
| 26. How dissatisfied have you been with your shape? | 0 | 1 | 2 | 3 | 4 | 5 | 6 |
| 27. How uncomfortable have you felt seeing your body (for example, seeing your shape in the mirror, in a shop window reflection, while undressing or taking a bath or shower)? | 0 | 1 | 2 | 3 | 4 | 5 | 6 |
| 28. How uncomfortable have you felt about others seeing your shape or figure (for example, in communal changing rooms, when swimming, or wearing tight clothes)? | 0 | 1 | 2 | 3 | 4 | 5 | 6 |

**What is your weight at present?** (Please give your best estimate.)**:**…………………....

**What is your height?** (Please give your best estimate.)**:** ……………………………….

**Age:** ……………………………

**If female:**

**Have you missed any menstrual periods over the past three to four months?** ……………….

If so, how many? ………………………….

Have you been taking the “pill”? ……………………….

Are you pregnant? ………………………….

If so, which week of pregnancy are you in? ………………….

# QUESTIONNAIRE ON MENTAL HEALTH (SCL-92)

Below is a list of problems and complaints that people sometimes have. Please read each one carefully and **enter the number** that best describes how much you were bothered by that problem during the past week.

**Please enter only ONE.**

| **FOR THE *PAST WEEK*, HOW MUCH WERE YOU BOTHERED BY:** | | | | | | |
| --- | --- | --- | --- | --- | --- | --- |
|  |  | **Not At All** | **A Little**  **Bit** | **Moderately** | **Quite A**  **Bit** | **Extremely** |
| 1 | Nervousness or shakiness inside (#2) | 0 | 1 | 2 | 3 | 4 |
| 2 | Feeling critical of others (#6) | 0 | 1 | 2 | 3 | 4 |
| 3 | Trouble remembering things (#9) | 0 | 1 | 2 | 3 | 4 |
| 4 | Feeling easily annoyed or irritated (#11) | 0 | 1 | 2 | 3 | 4 |
| 5 | Feeling low in energy or slowed down (#14) | 0 | 1 | 2 | 3 | 4 |
| 6 | Poor appetite (#19) | 0 | 1 | 2 | 3 | 4 |
| 7 | Feeling shy or uneasy with the opposite sex (#21) | 0 | 1 | 2 | 3 | 4 |
| 8 | Suddenly scared for no reason (#23) | 0 | 1 | 2 | 3 | 4 |
| 9 | Temper outbursts that you could not control (#24) | 0 | 1 | 2 | 3 | 4 |
| 10 | Blaming yourself for things (#26) | 0 | 1 | 2 | 3 | 4 |
| 11 | Feeling blocked in getting things done (#28) | 0 | 1 | 2 | 3 | 4 |
| 12 | Feeling blue (#30) | 0 | 1 | 2 | 3 | 4 |
| 13 | Worrying too much about things (#31) | 0 | 1 | 2 | 3 | 4 |
| 14 | Feeling no interest in things (#32) | 0 | 1 | 2 | 3 | 4 |
| 15 | Your feelings being easily hurt (#34) | 0 | 1 | 2 | 3 | 4 |

| **FOR THE *PAST WEEK*, HOW MUCH WERE YOU BOTHERED BY:** | | | | | | |
| --- | --- | --- | --- | --- | --- | --- |
|  |  | **Not At All** | **A Little**  **Bit** | **Moderately** | **Quite A**  **Bit** | **Extremely** |
| 16 | Feeling others do not understand you or are unsympathetic (#36) | 0 | 1 | 2 | 3 | 4 |
| 17 | Feeling that people are unfriendly or dislike you (#37) | 0 | 1 | 2 | 3 | 4 |
| 18 | Feeling inferior to others (#41) | 0 | 1 | 2 | 3 | 4 |
| 19 | Having to check and double-check what you do (#45) | 0 | 1 | 2 | 3 | 4 |
| 20 | Having to avoid certain things, places, or activities because they frighten you (#50) | 0 | 1 | 2 | 3 | 4 |
| 21 | Trouble concentrating (#55) | 0 | 1 | 2 | 3 | 4 |
| 22 | Overeating (#60) | 0 | 1 | 2 | 3 | 4 |
| 23 | Feeling uneasy when people are watching or talking about you (#61) | 0 | 1 | 2 | 3 | 4 |
| 24 | Having to repeat the same actions such as touching, counting, washing (#65) | 0 | 1 | 2 | 3 | 4 |
| 25 | Sleep that is restless or disturbed (#66) | 0 | 1 | 2 | 3 | 4 |
| 26 | Feeling very self-conscious with others (#69) | 0 | 1 | 2 | 3 | 4 |
| 27 | Feeling everything is an effort (#71) | 0 | 1 | 2 | 3 | 4 |
| 28 | Spells of terror or panic (#72) | 0 | 1 | 2 | 3 | 4 |
| 29 | Feeling uncomfortable about eating or drinking in public (#73) | 0 | 1 | 2 | 3 | 4 |
| 30 | Feeling so restless you couldn't sit still (#78) | 0 | 1 | 2 | 3 | 4 |

**ALCOHOL HABITS (AUDIT)**

Please circle the answer that is correct for you. If you do not drink alcohol, just circle *Never* in the first question.

|  | Never | Monthly or less | 2-4 times a month | 2-3 times a week | 4 or more times a week |
| --- | --- | --- | --- | --- | --- |
| 1. How often do you have a drink containing alcohol? | 0 | 1 | 2 | 3 | 4 |

|  | 1 or 2 | 3 or 4 | 5 or 6 | 7 or 9 | 10 or more |
| --- | --- | --- | --- | --- | --- |
| 2. How many standard drinks containing alcohol do you have on a typical day when  drinking? | 0 | 1 | 2 | 3 | 4 |
|  | **Never** | **Less than monthly** | **Monthly** | **Weekly** | **Daily or almost daily** |
| 3. How often do you have six or more drinks on one occasion? | 0 | 1 | 2 | 3 | 4 |
| 4. During the past year, how often have you found that you were not able to stop  drinking once you had started? | 0 | 1 | 2 | 3 | 4 |
| 5. During the past year, how often have you failed to do what was normally expected of you because of drinking? | 0 | 1 | 2 | 3 | 4 |
| 6. During the past year, how often have you needed a drink in the morning to get  yourself going after a heavy drinking session? | 0 | 1 | 2 | 3 | 4 |
| 7. During the past year, how often have you had a feeling of guilt or remorse after  drinking? | 0 | 1 | 2 | 3 | 4 |
| 8. During the past year, have you been unable to remember what happened the night before because you had been drinking? | 0 | 1 | 2 | 3 | 4 |

|  | No | Yes, but not in the past year | Yes, during the past year |
| --- | --- | --- | --- |
| 9. Have you or someone else been injured as a result of your drinking? | 0 | 2 | 4 |
| 10. Has a relative or friend, doctor or other health worker been concerned about your  drinking or suggested you cut down? | 0 | 2 | 4 |

**If you have any comments regarding the questionnaires, please write them here:**

**________________________________________________________________________________________________________________________________________________________________________________________________________________________________________________________________________________________________________________________________________________________________________________________________________________________________________________________________________________________________________________________________________________________________________________________________________________________________________________________________________________________________________________________________________________________________________________________**

**Thank you so much for participating!**

**Danish version of the full FADK questionnaire**

**SPØRGESKEMA OM SPISEVANER (Yale Food Addiction Scale 2.0)**

Dette spørgeskema omhandler dine spisevaner gennem det seneste år. Folk har sommetider vanskeligt ved at kontrollere, hvor meget de spiser af bestemte madvarer som f.eks.:

-Søde sager som is, chokolade, doughnuts/wienerbrød, småkager, kage, slik

-Kulhydrater som hvidt brød, rundstykker/boller, pasta og ris

-Saltede snacks som chips, saltstænger og saltkiks

-Fed mad som bøf, bacon, hamburgere, cheeseburgere, pizza og pomfritter

-Sukkerholdige drikkevarer som sodavand, saftevand, sportsdrikke og energidrikke

Når de følgende spørgsmål spørger til ”BESTEMTE MADVARER”, bedes du tænke på HVILKEN SOM HELST type madvarer eller drikkevarer svarende til dem fra ovennævnte mad- og drikkevare grupper - eller HVILKEN SOM HELST ANDEN type mad, som du har haft problemer med gennem det seneste år.

| **I DE SENESTE 12 MÅNEDER** | **Aldrig** | **Mindre end en gang om måneden** | **En gang om måneden** | **2-3 gange om måneden** | **En gang om ugen** | **2-3 gange om ugen** | **4-6 gange om ugen** | **Hver dag** |
| --- | --- | --- | --- | --- | --- | --- | --- | --- |
| 1. Når jeg begyndte at spise bestemte madvarer, spiste jeg meget mere end planlagt. | 0 | 1 | 2 | 3 | 4 | 5 | 6 | 7 |
| 1. Jeg fortsatte med at spise bestemte madvarer, selvom jeg ikke længere var sulten. | 0 | 1 | 2 | 3 | 4 | 5 | 6 | 7 |
| 1. Jeg spiste, indtil jeg blev fysisk dårlig. | 0 | 1 | 2 | 3 | 4 | 5 | 6 | 7 |
| 1. Jeg tænkte meget på at skære ned på bestemte madvarer, men jeg spiste dem alligevel. | 0 | 1 | 2 | 3 | 4 | 5 | 6 | 7 |
| 1. Jeg brugte meget tid på at føle mig sløv eller træt på grund af overspisningen. | 0 | 1 | 2 | 3 | 4 | 5 | 6 | 7 |
| 1. Jeg brugte meget tid på at spise bestemte madvarer i løbet af dagen. | 0 | 1 | 2 | 3 | 4 | 5 | 6 | 7 |
| 1. Når bestemte madvarer ikke var tilgængelige, gjorde jeg alt, hvad jeg kunne for at skaffe dem (for eksempel tog jeg på indkøb for at få bestemte madvarer, selvom jeg havde andet at spise derhjemme). | 0 | 1 | 2 | 3 | 4 | 5 | 6 | 7 |
| 1. Jeg spiste bestemte madvarer så ofte eller i så store mængder, at jeg holdt op med at gøre andre vigtige ting (f.eks. at arbejde eller tilbringe tid med min familie eller mine venner). | 0 | 1 | 2 | 3 | 4 | 5 | 6 | 7 |
| **I DE SENESTE 12 MÅNEDER** | **Aldrig** | **Mindre end en gang om måneden** | **En gang om måneden** | **2-3 gange om måneden** | **En gang om ugen** | **2-3 gange om ugen** | **4-6 gange om ugen** | **Hver dag** |
| 1. Jeg havde problemer med min familie eller mine venner på grund af overspisningen. | 0 | 1 | 2 | 3 | 4 | 5 | 6 | 7 |
| 1. Jeg undgik arbejde, skole eller sociale aktiviteter, fordi jeg var bange for, at jeg ville overspise der. | 0 | 1 | 2 | 3 | 4 | 5 | 6 | 7 |
| 1. Når jeg skar ned på eller holdt op med at spise bestemte madvarer, blev jeg irritabel, nervøs eller trist. | 0 | 1 | 2 | 3 | 4 | 5 | 6 | 7 |
| 1. Hvis jeg havde fysiske symptomer, fordi jeg ikke havde spist bestemte madvarer, spiste jeg denne slags mad for at få det bedre. | 0 | 1 | 2 | 3 | 4 | 5 | 6 | 7 |
| 1. Hvis jeg havde følelsesmæssige problemer, fordi jeg ikke havde spist bestemte madvarer, spiste jeg denne slags mad for at få det bedre. | 0 | 1 | 2 | 3 | 4 | 5 | 6 | 7 |
| 1. Når jeg skar ned på eller holdt op med at spise bestemte madvarer, fik jeg fysiske symptomer (f.eks. hovedpine eller træthed). | 0 | 1 | 2 | 3 | 4 | 5 | 6 | 7 |
| 1. Når jeg skar ned på eller holdt op med at spise bestemte madvarer, fik jeg en stærk trang til dem (”craving”). | 0 | 1 | 2 | 3 | 4 | 5 | 6 | 7 |
| 1. Mine spisevaner har givet mig mange bekymringer. | 0 | 1 | 2 | 3 | 4 | 5 | 6 | 7 |
| 1. Jeg havde betydelige problemer i mit liv på grund af mad og spisning (f.eks. problemer med mine daglige gøremål, arbejde, skole, venner, familie eller helbred). | 0 | 1 | 2 | 3 | 4 | 5 | 6 | 7 |
| 1. Jeg havde det så dårligt med overspisningen, at jeg ikke fik gjort andre vigtige ting (f.eks. at gå på arbejde eller tilbringe tid med min familie eller mine venner). | 0 | 1 | 2 | 3 | 4 | 5 | 6 | 7 |
| 1. Min overspisning forhindrede mig i at tage mig af min familie eller udføre huslige pligter. | 0 | 1 | 2 | 3 | 4 | 5 | 6 | 7 |
| **I DE SENESTE 12 MÅNEDER** | **Aldrig** | **Mindre end en gang om måneden** | **En gang om måneden** | **2-3 gange om måneden** | **En gang om ugen** | **2-3 gange om ugen** | **4-6 gange om ugen** | **Hver dag** |
| 1. Jeg undgik arbejde, skole eller sociale arrangementer, fordi jeg ikke kunne spise bestemte madvarer der. | 0 | 1 | 2 | 3 | 4 | 5 | 6 | 7 |
| 1. Jeg undgik sociale situationer, fordi folk ikke ville synes om, at jeg spiste så meget. | 0 | 1 | 2 | 3 | 4 | 5 | 6 | 7 |
| 1. Jeg fortsatte med at spise på samme måde, selvom min spisning gav mig følelsesmæssige problemer. | 0 | 1 | 2 | 3 | 4 | 5 | 6 | 7 |
| 1. Jeg fortsatte med at spise på samme måde, selvom min spisning gav mig fysiske problemer. | 0 | 1 | 2 | 3 | 4 | 5 | 6 | 7 |
| 1. Jeg opnåede ikke lige så stor nydelse ved at spise den samme mængde mad, som jeg plejede. | 0 | 1 | 2 | 3 | 4 | 5 | 6 | 7 |
| 1. Jeg ville virkelig gerne skære ned på eller holde op med at spise bestemte madvarer, men jeg kunne bare ikke. | 0 | 1 | 2 | 3 | 4 | 5 | 6 | 7 |
| 1. Jeg var nødt til at spise mere og mere for at få de følelser frem, som jeg ville opnå med spisningen (f.eks. at mindske negative følelser som tristhed eller øge følelsen af nydelse/velvære). | 0 | 1 | 2 | 3 | 4 | 5 | 6 | 7 |
| 1. Jeg klarede mig ikke så godt på arbejdet eller i skolen, fordi jeg spiste for meget. | 0 | 1 | 2 | 3 | 4 | 5 | 6 | 7 |
| 1. Jeg fortsatte med at spise bestemte madvarer, selvom jeg vidste, at det var fysisk skadelig (for eksempel fortsatte jeg med at spise søde sager, selvom jeg havde sukkersyge, eller jeg fortsatte med at spise fed mad, selvom jeg havde hjerte-kar-sygdom). | 0 | 1 | 2 | 3 | 4 | 5 | 6 | 7 |
| 1. Jeg havde så stærk trang til at spise bestemte madvarer, at jeg ikke kunne tænke på noget andet. | 0 | 1 | 2 | 3 | 4 | 5 | 6 | 7 |
| **I DE SENESTE 12 MÅNEDER** | **Aldrig** | **Mindre end en gang om måneden** | **En gang om måneden** | **2-3 gange om måneden** | **En gang om ugen** | **2-3 gange om ugen** | **4-6 gange om ugen** | **Hver dag** |
| 1. Jeg havde så intens trang (”craving”) til bestemte madvarer, at jeg følte, at jeg måtte spise dem med det samme. | 0 | 1 | 2 | 3 | 4 | 5 | 6 | 7 |
| 1. Jeg forsøgte at skære ned på eller holde op med at spise bestemte madvarer, men det lykkedes ikke for mig. | 0 | 1 | 2 | 3 | 4 | 5 | 6 | 7 |
| 1. Jeg forsøgte at skære ned på eller holde op med at spise bestemte madvarer, men jeg kunne ikke. | 0 | 1 | 2 | 3 | 4 | 5 | 6 | 7 |
| 1. Jeg var så distraheret af at spise, at jeg kunne være kommet til skade (f.eks. når jeg kørte bil, gik over vejen, betjente maskiner). | 0 | 1 | 2 | 3 | 4 | 5 | 6 | 7 |
| 1. Jeg var så distraheret af at tænke på mad, at jeg kunne være kommet til skade (f.eks. når jeg kørte bil, gik over vejen, betjente maskiner). | 0 | 1 | 2 | 3 | 4 | 5 | 6 | 7 |
| 1. Mine venner eller min familie var bekymrede over, hvor meget jeg overspiste. | 0 | 1 | 2 | 3 | 4 | 5 | 6 | 7 |

**TRIVSEL (WHO-5)**

Sæt venligst ved hvert af de 5 udsagn et kryds i det felt der kommer tættest på hvordan **du har følt dig i de**

**seneste to uger.** Bemærk at et højere tal står for bedre trivsel.

Eksempel: Hvis du har følt dig glad og i godt humør i lidt mere end halvdelen af tiden i **de sidste to uger,**

så sæt krydset i feltet med 3-tallet i øverste højre hjørne.

| **I DE SIDSTE 2 UGER…** | **Hele tiden** | **Det meste af tiden** | **Lidt mere end halvdelen af tiden** | **Lidt mindre end halvdelen af tiden** | **Lidt af tiden** | **På intet tidspunkt** |
| --- | --- | --- | --- | --- | --- | --- |
| 1. .. har jeg været glad og i godt humør | 5 | 4 | 3 | 2 | 1 | 0 |
| 1. .. har jeg følt mig rolig og afslappet | 5 | 4 | 3 | 2 | 1 | 0 |
| 1. .. har jeg følt mig aktiv og energisk | 5 | 4 | 3 | 2 | 1 | 0 |
| 1. .. er jeg vågnet frisk og udhvilet | 5 | 4 | 3 | 2 | 1 | 0 |
| 1. .. har min dagligdag været fyldt med ting der interesserer mig | 5 | 4 | 3 | 2 | 1 | 0 |

**SPØRGESKEMA OM SPISNING (EDE-Q)**

**Vejledning: Nedenstående spørgsmål drejer sig kun om de sidste fire uger (28 dage). Læs venligst hvert spørgsmål omhyggeligt og vær venlig at besvare alle spørgsmål, tak.**
Spørgsmål 1-12: Sæt venligst en cirkel om det nummer til højre, der passer. Husk at spørgsmålene kun drejer sig om **de sidste fire uger (28 dage)**

| I hvor mange af de **sidste 28 dage** ..... | 0 dage | 1-5 dage | 6-12 dage | 13-15 dage | 16-22 dage | 23-27 dage | Hver dag |
| --- | --- | --- | --- | --- | --- | --- | --- |
| 1. Har du bevidst forsøgt på at begrænse den mængde mad, du spiser, for at påvirke din figur eller vægt (uanset om det er lykkedes)? | 0 | 1 | 2 | 3 | 4 | 5 | 6 |
| 2. Har du gået i lang tid (8 timer eller mere i vågen tilstand) uden at spise noget overhovedet for at påvirke din figur eller vægt? | 0 | 1 | 2 | 3 | 4 | 5 | 6 |
| 3. Har du forsøgt at udelade nogle former for mad, som du kan lide, fra din kost for at påvirke din figur eller vægt (uanset om det er lykkedes)? | 0 | 1 | 2 | 3 | 4 | 5 | 6 |
| 4. Har du forsøgt at følge klare regler med hensyn til din spisning (for eksempel en kaloriegrænse) for at påvirke din figur eller vægt (uanset om det er lykkedes)? | 0 | 1 | 2 | 3 | 4 | 5 | 6 |
| 5. Har du haft et klart ønske om at have en tom mave med det formål at påvirke din figur eller vægt? | 0 | 1 | 2 | 3 | 4 | 5 | 6 |
| 6. Har du haft et klart ønske om at have en fuldstændig flad mave? | 0 | 1 | 2 | 3 | 4 | 5 | 6 |
| 7. Har det at tænke på mad, spisning eller kalorier gjort det meget vanskeligt at koncentrere dig om ting, du er interesseret i (for eksempel arbejde, at følge med i en samtale eller at læse)? | 0 | 1 | 2 | 3 | 4 | 5 | 6 |
| 8. Har det at tænke på figur og vægt gjort det meget vanskeligt at koncentrere dig om ting, du er interesseret i (for eksempel arbejde, at følge med i en samtale eller at læse)? | 0 | 1 | 2 | 3 | 4 | 5 | 6 |
| 9. Har du haft en klar frygt for at miste kontrol over at spise? | 0 | 1 | 2 | 3 | 4 | 5 | 6 |
| 10. Har du haft en klar frygt for, at du kunne tage på i vægt? | 0 | 1 | 2 | 3 | 4 | 5 | 6 |
| 11. Har du følt dig tyk? | 0 | 1 | 2 | 3 | 4 | 5 | 6 |
| 12. Har du haft et stærkt ønske om at tabe dig? | 0 | 1 | 2 | 3 | 4 | 5 | 6 |
|  |  |  |  |  |  |  |  |

Spørgsmål 13-18: Sæt venligst en cirkel om det nummer til højre, der passer. Husk at spørgsmålene kun drejer sig om de **sidste fire uger (28 dage).**

| I hvor mange af de **sidste 28 dage** ..... | 0 dage | 1-5 dage | 6-12 dage | 13-15 dage | 16-22 dage | 23-27 dage | Hver dag |
| --- | --- | --- | --- | --- | --- | --- | --- |
| 13. Hvor mange gange i løbet af de sidste 28 dage har du spist hvad andre mennesker (efter omstændighederne) ville betragte som en usædvanlig stor mængde mad? | 0 | 1 | 2 | 3 | 4 | 5 | 6 |
| 14. ..... Hvor mange af disse gange har du haft en følelse af at have mistet kontrol over din spisning (på det tidspunkt, hvor du spiste)? | 0 | 1 | 2 | 3 | 4 | 5 | 6 |
| 15. Hvor mange DAGE inden for de sidste 28 dage har der været sådanne episoder med overspisning (d.v.s. hvor du har spist en usædvanlig stor mængde mad og har haft en følelse af, at du på dette tidspunkt havde mistet kontrollen) | 0 | 1 | 2 | 3 | 4 | 5 | 6 |
| 16. Hvor mange gange inden for de sidste 28 dage har du fremkaldt opkastning for at kontrollere din figur eller vægt? | 0 | 1 | 2 | 3 | 4 | 5 | 6 |
| 17. Hvor mange gange inden for de sidste 28 dage har du taget afførringsmidler for at kontrollere din figur og vægt? | 0 | 1 | 2 | 3 | 4 | 5 | 6 |
| 18. Hvor mange gange inden for de sidste 28 dage har du motioneret på en "tvangsmæssig" måde for at kontrollere din vægt, figur eller fedtmængde eller for at brænde kalorier af? | 0 | 1 | 2 | 3 | 4 | 5 | 6 |

Spørgsmål 19-21: Sæt venligst en cirkel om det nummer til højre, der passer. Læg mærke til, at i disse spørgsmål betyder udtrykket "overspisning" at spise, hvad andre efter omstændighederne ville anse for en usædvanlig stor mængde mad, ledsaget af en følelse af at have tabt kontrollen over spisningen.

| I hvor mange af de **sidste 28 dage** ..... | 0  dage | 1-5 dage | 6-12  dage | 13-15 dage | 16-22 dage | 23-27 dage | Hver  dag |
| --- | --- | --- | --- | --- | --- | --- | --- |
| 19. Hvor mange dage har du inden for de sidste 28 dage spist i hemmelighed (d.v.s. i smug)?  .... Overspisninger skal ikke tælles med | 0 | 1 | 2 | 3 | 4 | 5 | 6 |
|  | Ingen af gangene | Få af gangene | Mindre end halvdelen | Halvdelen af gangene | Mere  end halvdelen | De fleste gange | Hver gang |
| 20. Hvor stor en del af de gange du har spist, har du følt dig skyldig (følt du har gjort noget forkert) på grund af virkningen heraf på din figur eller vægt  .... Overspisninger skal ikke tælles med | 0 | 1 | 2 | 3 | 4 | 5 | 6 |
|  | Slet ikke |  | Kun lidt |  | Noget |  | Udpræget |
| 21. Hvor bekymret har du været inden for de sidste 28 dage over, at andre mennesker kunne se dig spise  ... Overspisninger skal ikke tælles med | 0 | 1 | 2 | 3 | 4 | 5 | 6 |

Spørgsmål 22-28: Sæt venligst en cirkel om det nummer til højre, der passer. Husk at spørgsmålene kun drejer sig om **de sidste fire uger (28 dage)**.

| I hvor mange af de **sidste 28 dage .....** | Slet ikke |  | Kun lidt |  | Noget |  | Udpræget |
| --- | --- | --- | --- | --- | --- | --- | --- |
| 22. Har din vægt haft indflydelse på, hvordan du tænker på (bedømmer) dig selv som menneske? | 0 | 1 | 2 | 3 | 4 | 5 | 6 |
| 23. Har din figur haft indflydelse på hvordan du tænker på (bedømmer) dig selv som menneske? | 0 | 1 | 2 | 3 | 4 | 5 | 6 |
| 24. Hvor ubehageligt ville det have været for dig, hvis du var blevet bedt om at veje dig en gang om ugen (hverken mere eller mindre) i løbet af de næste 4 uger? | 0 | 1 | 2 | 3 | 4 | 5 | 6 |
| 25. Hvor utilfreds har du været med din vægt? | 0 | 1 | 2 | 3 | 4 | 5 | 6 |
| 26. Hvor utilfreds har du været med din figur? | 0 | 1 | 2 | 3 | 4 | 5 | 6 |
| 27. Hvor utilpas har du følt dig, når du har set din krop (for eksempel når du har set din figur i spejlet, spejlet dig i en vinduesrude, mens du har klædt dig af, eller har taget et bad eller et styrtebad)? | 0 | 1 | 2 | 3 | 4 | 5 | 6 |
| 28. Hvor utilpas har du følt dig ved, at andre ser din skikkelse eller figur (for eksempel i fælles omklædningsrum, til svømning, eller når du har haft tætsiddende tøj på)? | 0 | 1 | 2 | 3 | 4 | 5 | 6 |

**Hvad er din nuværende vægt?** (angiv det venligst så tæt på som muligt) …………………....

**Hvad er din højde?** (angiv det venligst så tæt på som muligt) ……………………………….

**Alder:** ……………………………

**Hvis du er af hunkøn:**

Er der nogle menstruationer,

du ikke har haft i løbet af de sidste 3 til 4 måneder? ………………………….

Hvis ja, hvor mange? ………………………….

Har du taget p-piller? ………………………….

Er du gravid? ………………………….

Hvis ja, hvilken uge? ………………………….

# SPØRGESKEMA OM MENTAL OG FYSISK SUNDHED (SCL-92)

# INSTRUKTION

Nedenfor er anført en række problemer og gener, som man undertiden kan have. Læs venligst hver enkelt grundigt. Når du har gjort det, bedes du venligst lave en cirkel om det nummer til højre, der bedst beskriver, **i hvor høj grad det pågældende problem har voldt dig ubehag i løbet af den sidste uge inklusiv i dag.** Lav kun én cirkel for hvert problem. Hvis du skifter mening, bedes du slette din første markering tydeligt.Det er af stor betydning, at du besvarer **alle** spørgsmålene.

| **I hvilken grad har du været plaget af:** | |  |  |  |  |  |
| --- | --- | --- | --- | --- | --- | --- |
|  |  | **Slet ikke** | **Lidt** | **Noget** | **En hel del** | **Særdeles meget** |
| 1 | Nervøsitet eller indre uro (#2) | 0 | 1 | 2 | 3 | 4 |
| 2 | At føle dig kritisk over for andre (#6) | 0 | 1 | 2 | 3 | 4 |
| 3 | Besvær med at huske (#9) | 0 | 1 | 2 | 3 | 4 |
| 4 | En følelse af, at du let bliver ærgerlig eller irriteret (#11) | 0 | 1 | 2 | 3 | 4 |
| 5 | En følelse af manglende energi eller af at være langsom (#14) | 0 | 1 | 2 | 3 | 4 |
| 6 | Manglende appetit (#19) | 0 | 1 | 2 | 3 | 4 |
| 7 | At føle dig genert eller usikker over for det modsatte køn (#21) | 0 | 1 | 2 | 3 | 4 |
| 8 | At du pludselig bliver bange uden grund (#23) | 0 | 1 | 2 | 3 | 4 |
| 9 | Vredesudbrud, som du ikke kan kontrollere (#24) | 0 | 1 | 2 | 3 | 4 |
| 10 | Selvbebrejdelser (#26) | 0 | 1 | 2 | 3 | 4 |
| 11 | En følelse af ikke at kunne overkomme noget (#28) | 0 | 1 | 2 | 3 | 4 |
| 12 | At føle dig nedtrykt (#30) | 0 | 1 | 2 | 3 | 4 |
| 13 | At bekymre dig for meget (#31) | 0 | 1 | 2 | 3 | 4 |
| 14 | At du ikke føler dig interesseret i noget (#32) | 0 | 1 | 2 | 3 | 4 |
| 15 | At du let bliver såret (#34) | 0 | 1 | 2 | 3 | 4 |

| **I hvilken grad har du været plaget af:** | |  |  |  |  |  |
| --- | --- | --- | --- | --- | --- | --- |
|  |  | **Slet ikke** | **Lidt** | **Noget** | **En hel del** | **Særdeles meget** |
| 16 | En følelse af, at andre ikke forstår dig eller er ufølsomme (#36) | 0 | 1 | 2 | 3 | 4 |
| 17 | En følelse af, at folk er uvenlige eller ikke kan lide dig (#37) | 0 | 1 | 2 | 3 | 4 |
| 18 | En følelse af mindreværd (#41) | 0 | 1 | 2 | 3 | 4 |
| 19 | At være nødt til at kontrollere alt, hvad du gør, igen og igen (#45) | 0 | 1 | 2 | 3 | 4 |
| 20 | At være nødt til at undgå visse ting, steder eller aktiviteter, fordi de skræmmer dig (#50) | 0 | 1 | 2 | 3 | 4 |
| 21 | At du har svært ved at koncentrere dig (#55) | 0 | 1 | 2 | 3 | 4 |
| 22 | At du spiser for meget (#60) | 0 | 1 | 2 | 3 | 4 |
| 23 | At du føler dig usikker, når folk iagttager dig eller taler om dig (#61) | 0 | 1 | 2 | 3 | 4 |
| 24 | At du er nødt til at gentage de samme handlinger, f.eks. vaske eller tælle (#65) | 0 | 1 | 2 | 3 | 4 |
| 25 | Hvileløs eller urolig søvn (#66) | 0 | 1 | 2 | 3 | 4 |
| 26 | At være meget genert over for andre (#69) | 0 | 1 | 2 | 3 | 4 |
| 27 | En følelse af, at alting er anstrengende (#71) | 0 | 1 | 2 | 3 | 4 |
| 28 | Anfald af rædsel eller panik (#72) | 0 | 1 | 2 | 3 | 4 |
| 29 | En følelse af ubehag ved at spise eller drikke i andres påsyn (#73) | 0 | 1 | 2 | 3 | 4 |
| 30 | At du føler dig rastløs, at du ikke kan sidde stille (#78) | 0 | 1 | 2 | 3 | 4 |

**ALKOHOLVANER (AUDIT)**

I det følgende spørges der ind til dine alkoholvaner. Sæt venligst cirkel om det svar, som passer bedst.

Hvis du slet ikke drikker alkohol, svarer du bare aldrig til første spørgsmål.

|  | Aldrig | Højest én  gang om måneden | 2-4 gange  om måneden | 2-3 gange  om ugen | 4 gange om ugen eller oftere |
| --- | --- | --- | --- | --- | --- |
| 1. Hvor tit drikker du noget, der indeholder alkohol? | 0 | 1 | 2 | 3 | 4 |

|  | 1-2  genstande | 3-4  genstande | 5-6  genstande | 7-9  genstande | 10 eller flere  genstande |
| --- | --- | --- | --- | --- | --- |
| 2. Hvor mange genstande drikker du almindeligvis, når du drikker noget? | 0 | 1 | 2 | 3 | 4 |

|  | Aldrig | Sjældent | Månedligt | Ugentligt | Dagligt eller  næsten dagligt |
| --- | --- | --- | --- | --- | --- |
| 3. Hvor tit drikker du fem genstande eller flere ved samme lejlighed? | 0 | 1 | 2 | 3 | 4 |
| 4. Har du inden for det seneste år oplevet, at du ikke kunne stoppe, når du først var begyndt at drikke? | 0 | 1 | 2 | 3 | 4 |
| 5. Har du inden for det seneste år oplevet, at du ikke kunne gøre det, du skulle, fordi du havde drukket? | 0 | 1 | 2 | 3 | 4 |
| 6. Har du inden for det seneste år måttet have en lille én om morgenen, efter at du havde drukket meget dagen før? | 0 | 1 | 2 | 3 | 4 |
| 7. Har du inden for det seneste år haft dårlig samvittighed eller fortrudt, efter du har drukket? | 0 | 1 | 2 | 3 | 4 |
| 8. Har du inden for det seneste år oplevet, at du ikke kunne huske, hvad der skete aftenen før, fordi du havde drukket? | 0 | 1 | 2 | 3 | 4 |

|  | Nej | Ja, men ikke inden for det seneste år | Ja, inden for  det seneste år |
| --- | --- | --- | --- |
| 9. Er du selv eller andre nogensinde kommet til skade ved en ulykke, fordi du havde drukket? | 0 | 2 | 4 |
| 10. Har nogen i familien, en ven, en læge eller andre været bekymret over dine alkoholvaner eller foreslået dig at sætte forbruget ned? | 0 | 2 | 4 |

**Hvis du har kommentarer til undersøgelsen eller noget du gerne vil uddybe, er du meget velkommen til at gøre det her:**

**________________________________________________________________________________________________________________________________________________________________________________________________________________________________________________________________________________________________________________________________________________________________________________________________________________________________________________________________________________________________________________________________________________________________________________________________________________________________________________________________________________________________________________________________________________________________________________________**

**Tusind tak for din besvarelse!**
